# Supplementary material for: Synthesis and properties of a novel tripodal bipyridyl ligand tb-carbinol and its Ru(II)–Re(I) trimetallic complexes: investigation of multimetallic artificial systems for photocatalytic CO2reduction
Source: Royal Society of Chemistry journal article supplement (doi:10.1039/b814340d), 2008-12-16
Supplement: b814340d.pdf [file b814340d.pdf]

**Synthesis and properties of a novel tripodal bipyridyl ligand tb-carbinol and its Ru(II)-Re(I) trimetallic complexes: investigation of multimetallic artificial systems for the photocatalytic CO<sub>2</sub> reduction**

Zhao-Yong Bian,<sup>\*,a,b</sup> Katsuhiko Sumi,<sup>b</sup> Masaoki Furue,<sup>\*,b</sup> Shunsuke Sato,<sup>c</sup> Kazuhide Koike,<sup>d</sup> and Osamu Ishitani<sup>c</sup>

<sup>a</sup> *Key Laboratory of Photochemical Conversion and Optoelectronic Materials, Technical Institute of Physics and Chemistry, Chinese Academy of Science, Beijing, 100190, P. R. China. Fax: 86-10-6255-4670; E-mail: bzy@mail.ipc.ac.cn*

<sup>b</sup> *Department of Environmental Systems Engineering, Kochi University of Technology, Tosayamada, Kochi, 782-8502, Japan. E-mail: masaoki.furue@kochi-tech.ac.jp*

<sup>c</sup> *Department of Chemistry, Graduate School of Science and Engineering, Tokyo Institute of Technology, Tokyo, 152-8551, Japan.*

<sup>d</sup> *National Institute of Advanced Industrial Science and Technology, Tsukuba, 305-8569, Japan.*

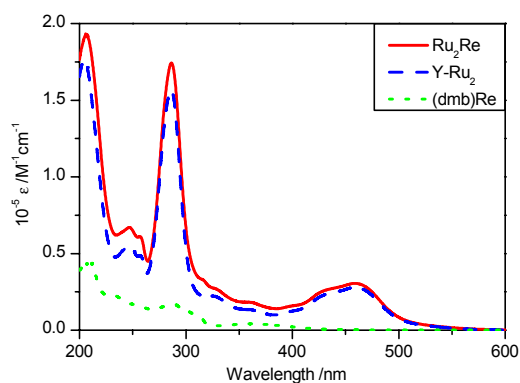

**Figure S1.** Absorption spectra of Ru<sub>2</sub>Re (red line), Y-Ru<sub>2</sub> (blue dash line), and (dmb)Re(CO)<sub>3</sub>Cl (green dot line) in acetonitrile at room temperature.

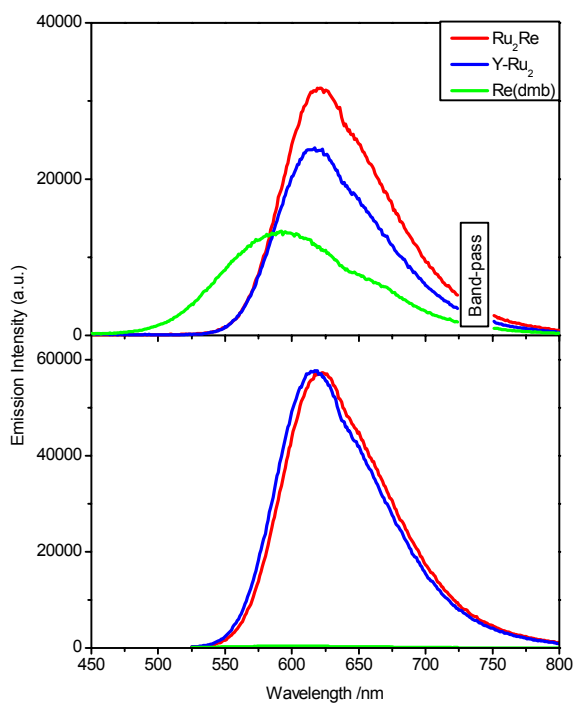

**Figure S2.** Emission spectra of Ru<sub>2</sub>Re ( $1 \times 10^{-5}$  M), Y-Ru<sub>2</sub> ( $1 \times 10^{-5}$  M), and (dmb)Re(CO)<sub>3</sub>Cl ( $1 \times 10^{-5}$  M) in degassed acetonitrile excited at 370 nm (top) and 450 nm (bottom) at room temperature.

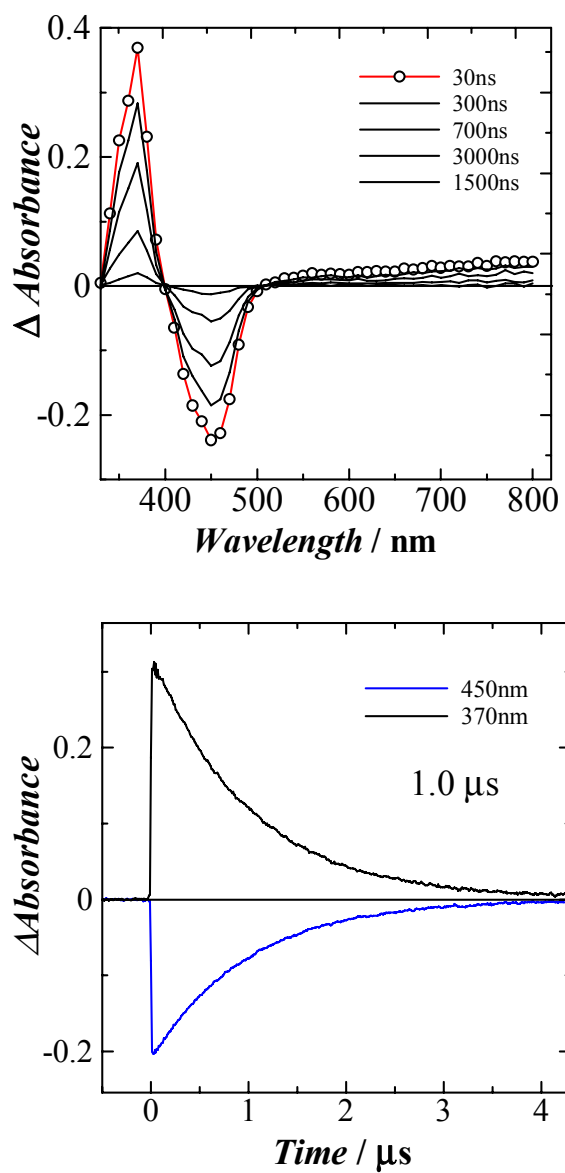

**Figure S3.** The transient absorption spectrum (top) and the transient states decay profiles (bottom) of  $[(\text{bpy}_2\text{Ru})_3(\text{tb-carbinol})]^{6+}$  in degassed acetonitrile.

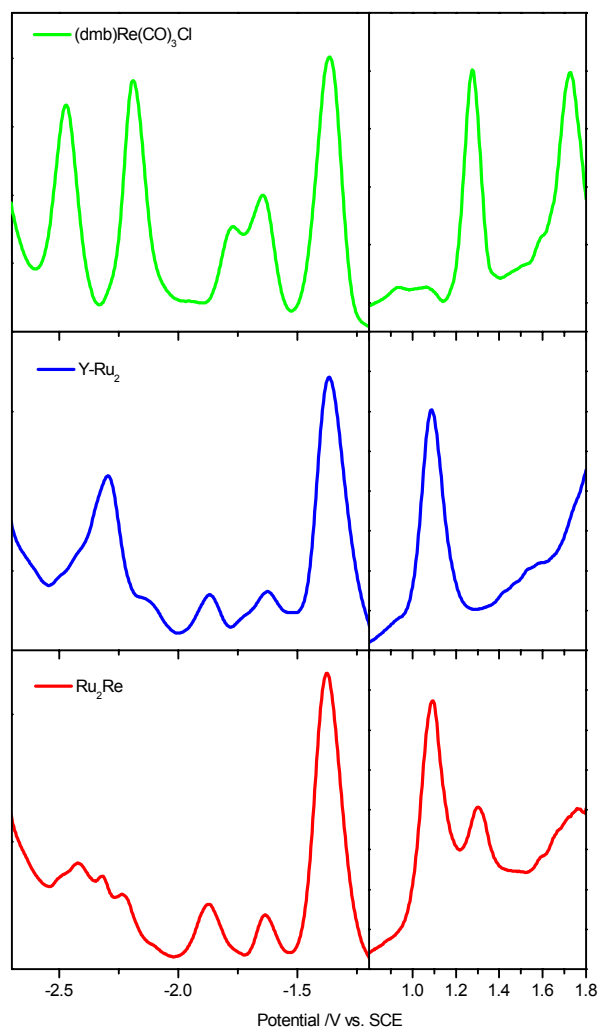

**Figure S4.** Differential Pulse Voltammograms of Ru<sub>2</sub>Re (bottom, red line), Y-Ru<sub>2</sub> (middle, blue line), and (dmb)Re(CO)<sub>3</sub>Cl (top, green line) in acetonitrile. The left part is the cathodic peaks; The right part represents the anodic peaks.
